# Supplementary material
Source: PubMed Central journal article supplement (PMC4338525)
Supplement: NIHMS60525-supplement-2.pdf [file NIHMS60525-supplement-2.pdf]

| Gene           | Primer | Sequence                 |
|----------------|--------|--------------------------|
| <i>Rpl13a</i>  | For    | CATGAGGTCGGGTGGAAGTA     |
|                | Rev    | GCCTGTTTCCGTAACCTCAA     |
| <i>Chil1</i>   | For    | AGCAGTATTCTCCACCCTGAT    |
|                | Rev    | ACCTTTCCTGCTGACAAAGC     |
| <i>Chil3</i>   | For    | ACCTGCCCGTTCAGTGCCAT     |
|                | Rev    | CCTTGGAAATGCTTTCTCCACAG  |
| <i>Chil4</i>   | For    | CAGAACCGTCAGACATTCATTA   |
|                | Rev    | ATGGTCCTCCAGTAGGTAATA    |
| <i>Il17a</i>   | For    | GCTCCAGAAGGCCCTCAGACT    |
|                | Rev    | CCAGCTTTCCTCCGCATTGA     |
| <i>Cxcl5</i>   | For    | GGGAAACCATTGTCCCTGA      |
|                | Rev    | TCCGATAGTGTGACAGATAGGAAA |
| <i>Nbactin</i> | For    | ACGACGTGGCAGCTCTCGTTGTGG |
|                | Rev    | GGTGCTTCGGTCAGCAGCACGGGA |
| <i>Il1b</i>    | For    | TGAGCACCTTCTTTTCCTCA     |
|                | Rev    | GCAGCTGTCTAATGGGAACG     |
| <i>Il23p19</i> | For    | CACCAGCGGGACATATGAA      |
|                | Rev    | CCTTGTGGGTCACAACCAT      |
| <i>Il18</i>    | For    | ACAGGCCTGACATCTTCTGC     |
|                | Rev    | CCTTGAAGTTGACGCAAGAGT    |

**Supplementary Table 1**

Primer sequences used for quantitative RT-PCR
